# Supplementary material
Source: PubMed Central journal article supplement (PMC4651166)
Supplement: gf530sup_10-1055-s-0032-1315355.pdf [file gf530sup_10-1055-s-0032-1315355.pdf]

# Prävention geburtsbedingter Beckenbodenschädigung – Was ist gesichert?

## Prevention of Labor-Associated Pelvic Floor Injuries – What is Known for Sure

**Autoren** H. B. G. Franz<sup>1</sup>, C. Erxleben<sup>2</sup>, A. Franz<sup>2</sup>, R. Hofmann<sup>1</sup>

**Institute** <sup>1</sup> Klinik für Gynäkologie und Geburtshilfe, Klinikum Braunschweig, Braunschweig  
<sup>2</sup> Charité – Universitätsmedizin, Berlin

**Tab. 1** Risiko für eine urethrale Belastungsincontinenz und Deszensusoperation in Relation zum Entbindungsmodus [10].

|                                                                                                                                                 |                          |
|-------------------------------------------------------------------------------------------------------------------------------------------------|--------------------------|
| insgesamt n = 96 396 Patienten                                                                                                                  |                          |
| nur vaginale Geburten vs. nur Sectioentbindungen                                                                                                |                          |
| (n = 63 229 Patienten)                                                                                                                          | (n = 33 167 Patienten)   |
| Belastungsincontinenz:                                                                                                                          | HR 2,9 (95%-KI 2,4–3,6)  |
| POP:                                                                                                                                            | HR 9,2 (95%-KI 7,0–12,1) |
| linearer Anstieg der Rate der durchgeführten Prolapschirurgie bei nur vaginal entbundenen Frauen bei einer Nachbeobachtung über fast 3 Dekaden! |                          |

**Tab. 2** Limitierter präventiver Vorteil der elektiven Sectio caesarea für die Entwicklung einer postpartalen Harninkontinenz [19].

|                                              |                           |
|----------------------------------------------|---------------------------|
| <b>Term Breech Trial</b>                     |                           |
| Untersuchungszeitpunkt: 3 Monate post partum |                           |
| Harninkontinenz                              | Sectio caesarea 4,5%      |
|                                              | vaginale Geburt 7,3%      |
|                                              | OR 0,62; 95%-KI 0,41–0,93 |
| aufgehobener Effekt nach 2 Jahren            |                           |

**Tab. 3** Das relative Risiko für eine Stuhl- und Flatusinkontinenz nach einer Sectio caesarea [23].

|                                                                   |                           |
|-------------------------------------------------------------------|---------------------------|
| <b>Systematischer Review</b>                                      |                           |
| (3010 Sectiones vs. 11 440 vaginale Geburten)                     |                           |
| nach Sectio:                                                      |                           |
| Stuhlinkontinenz                                                  | RR 0,91; 95%-KI 0,74–1,14 |
| Flatusinkontinenz                                                 | RR 0,98; 95%-KI 0,86–1,13 |
| 167 Sectiones verhindern <i>einen Fall</i> einer Stuhlinkontinenz |                           |

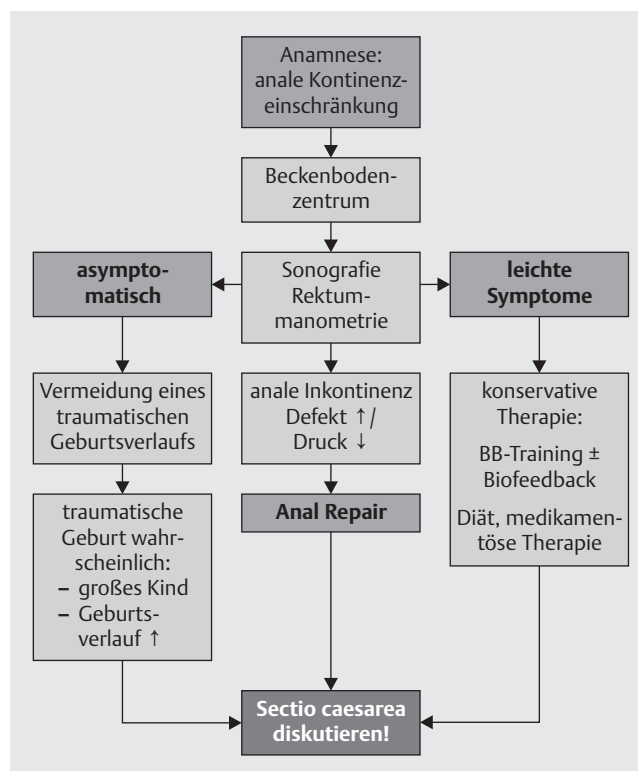

**Abb. 1** Behandlungspfad bei analer Kontinenz-einschränkung in der Anamnese und erneuter Schwangerschaft, in Anlehnung an Sultan et al. [27].
